# Supplementary material
Source: PubMed Central journal article supplement (PMC3307327)
Supplement: supp_M111.318295_Supplemental_data.pdf [file supp_M111.318295_Supplemental_data.pdf]

## Supplemental Figure Legends

**FIGURE S1. Flow cytometric analysis of logarithmically proliferating REF and REF-K6D3 cells.** Cytometric analysis was performed with the FACScan flow cytometer (Beckman Coulter ECPIS XL) equipped with a computer-programmed analysis of cell population in each cell cycle phase according to the manufacturer's manual.

**FIGURE S2. Mouse Embryonic Fibroblasts Overexpressing the Same Factors As for Rat Embryonic Fibroblasts Proliferate in Soft Agar but Form Smaller Colonies.** *A*, Similarly constructed MEF-K6D3-Cdc6 and MEF-K6D3-Cdc6-aRheb, REF-K6D3-Cdc6-Rheb and HeLa cells were cultured in soft agar medium for 2 and 3 weeks as above. An infrequently emerged large colony is shown beneath 3 weeks-cultured MEF-K6D3-Cdc6-Rheb colonies. *B*, MEF and MEF-K6D3-Cdc6-aRheb cells proliferating in culture dishes were analyzed for the levels of Cdc6, Cdk6, cyclin D3 and Rheb to confirm overexpression of these factors in the latter cell.

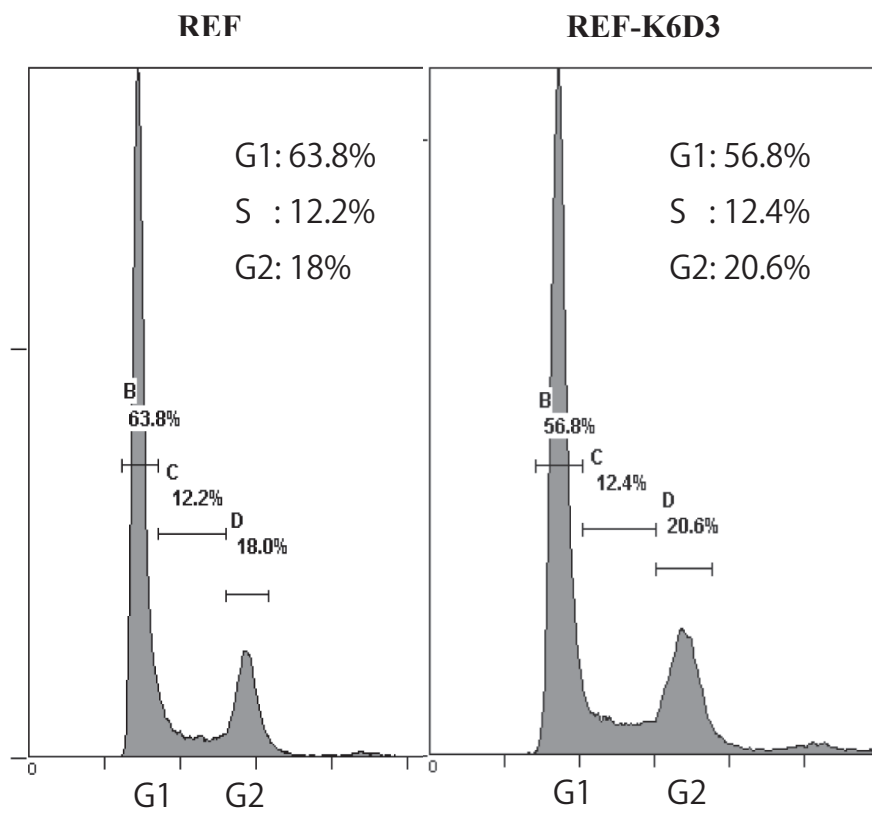

Figure S1. Uranbileg et al.

**A**

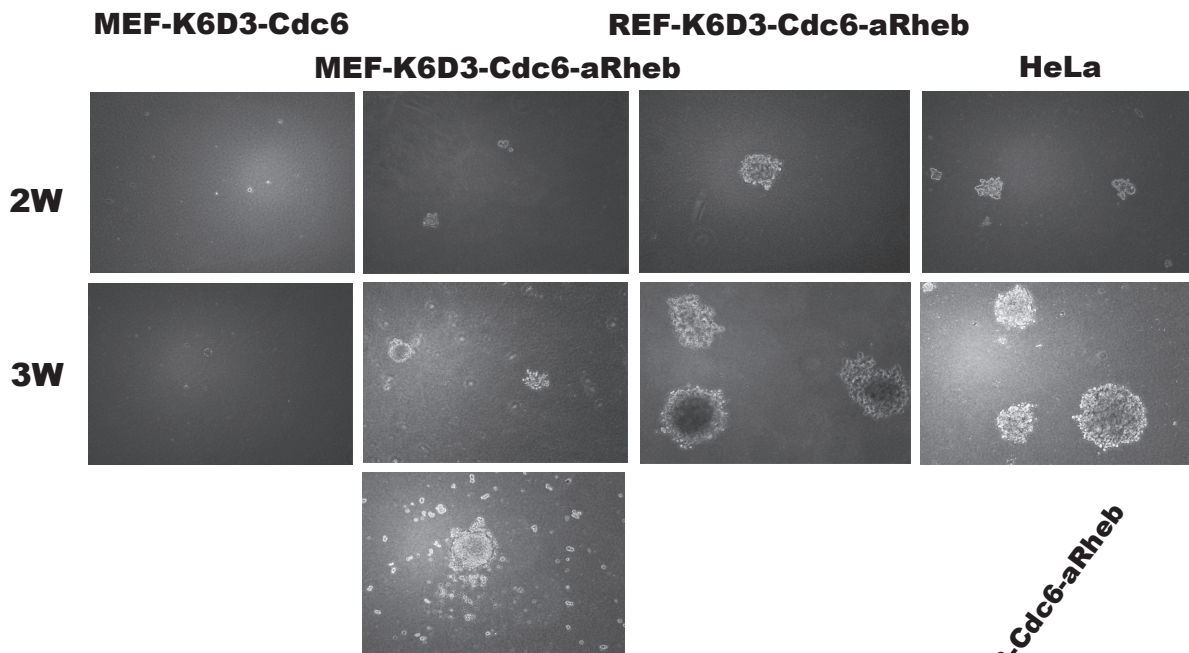

**B**

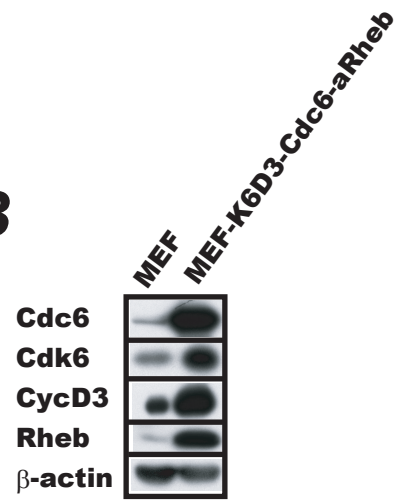

Figure S2. Uranbileg et al.
